# Supplementary material for: Palliative Care Utilization Following Out-of-Hospital Cardiac Arrest in Pediatrics
Source: PubMed Central journal article supplement — Crit Care Explor. 2022 Feb 18;4(2):e0639. doi: 10.1097/CCE.0000000000000639 (PMC8860333; doi:10.1097/cce.0000000000000639), 2022-02-18

**Supplemental Digital Content Figure Legend:**

**Figure 1.** Palliative Care Consultation Rates for all pediatric patients admitted to the PICU following an Outside-Hospital Cardiac Arrest by year. PPC= Pediatric Palliative Care

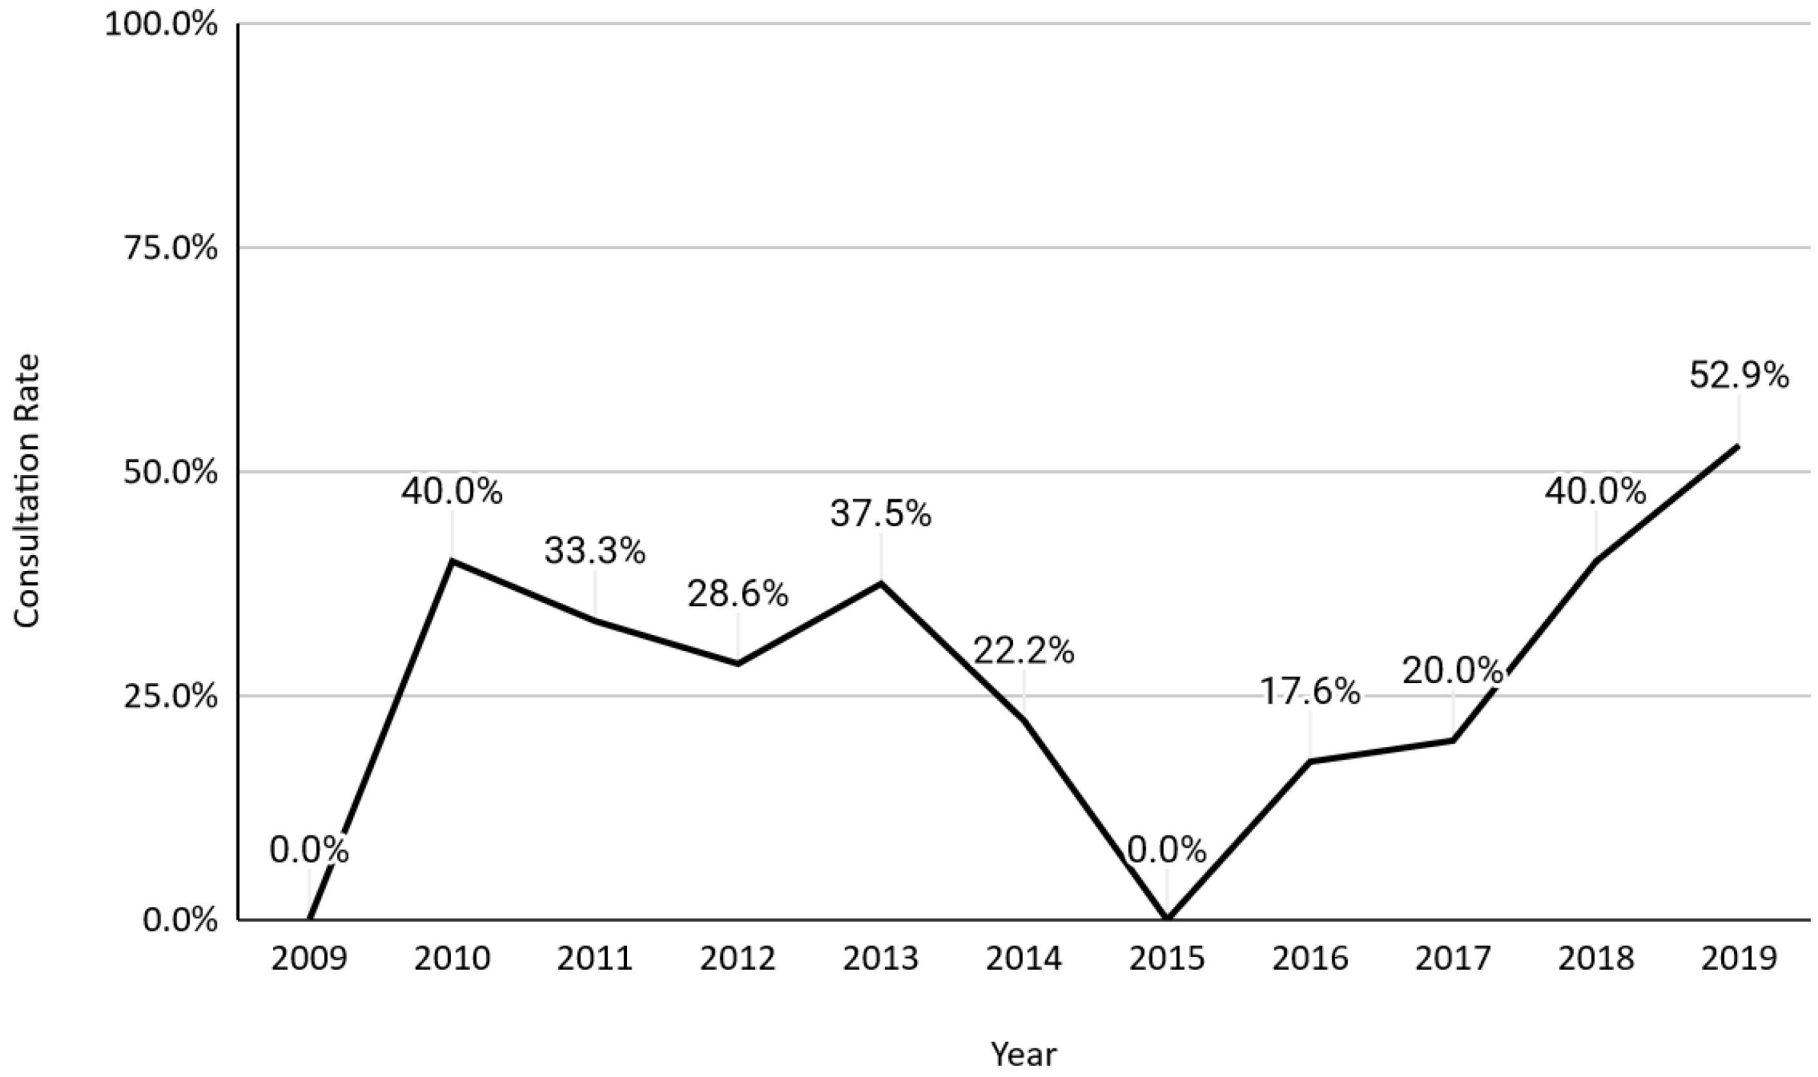

Supplement: cc9-4-e0639-s001.pdf [file cc9-4-e0639-s001.pdf]
